# Supplementary material
Source: MDPI journal article supplement (https://www.mdpi.com/2072-4292/15/23/5510)

# Bridging the Gap: Analyzing the Relationship Between Environmental Justice Awareness on Twitter and Socio-Environmental Factors Using Remote Sensing and Big Data

Charles Knoble, Danlin Yu \*

Figure S1. Study Area Census Tracts – Urban Levels

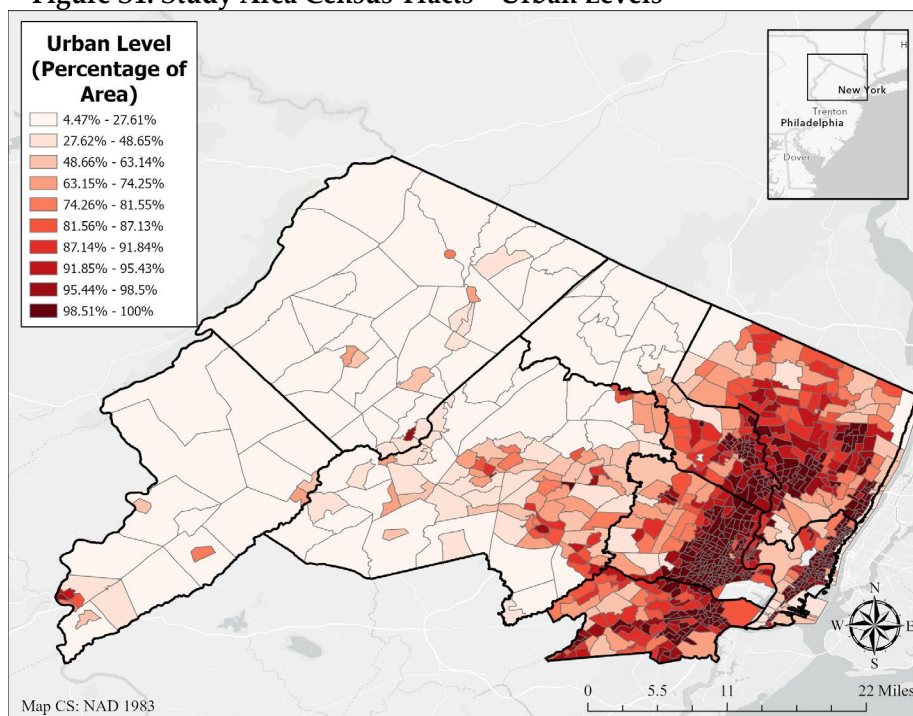

Figure S2. Study Area Census Tracts – Transit Stations

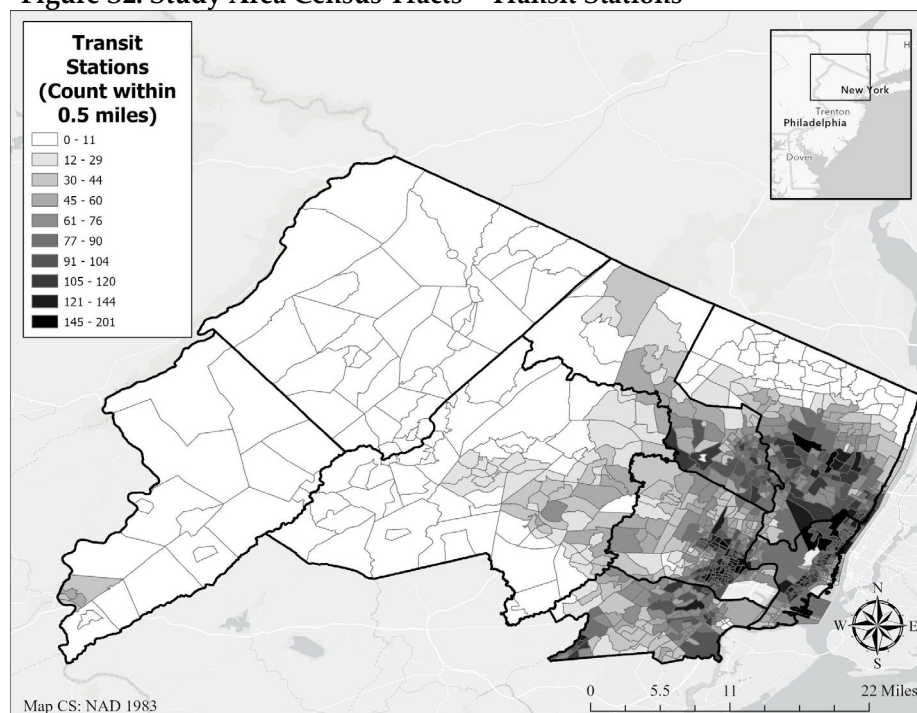

**Citation:** Lastname, F.; Lastname, F.; Lastname, F. Title. *Remote Sens.* **2022**, *14*, x. <https://doi.org/10.3390/xxxxx>  
**Academic Editor:** Firstname Last-name

Received: date

Accepted: date

Published: date

**Publisher's Note:** MDPI stays neutral with regard to jurisdictional claims in published maps and institutional affiliations.

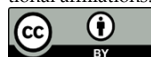

**Copyright:** © 2022 by the authors. Submitted for possible open access publication under the terms and conditions of the Creative Commons Attribution (CC BY) license (<https://creativecommons.org/licenses/by/4.0/>).

Figure S3. Study Area Census Tracts – Mean PM<sub>2.5</sub>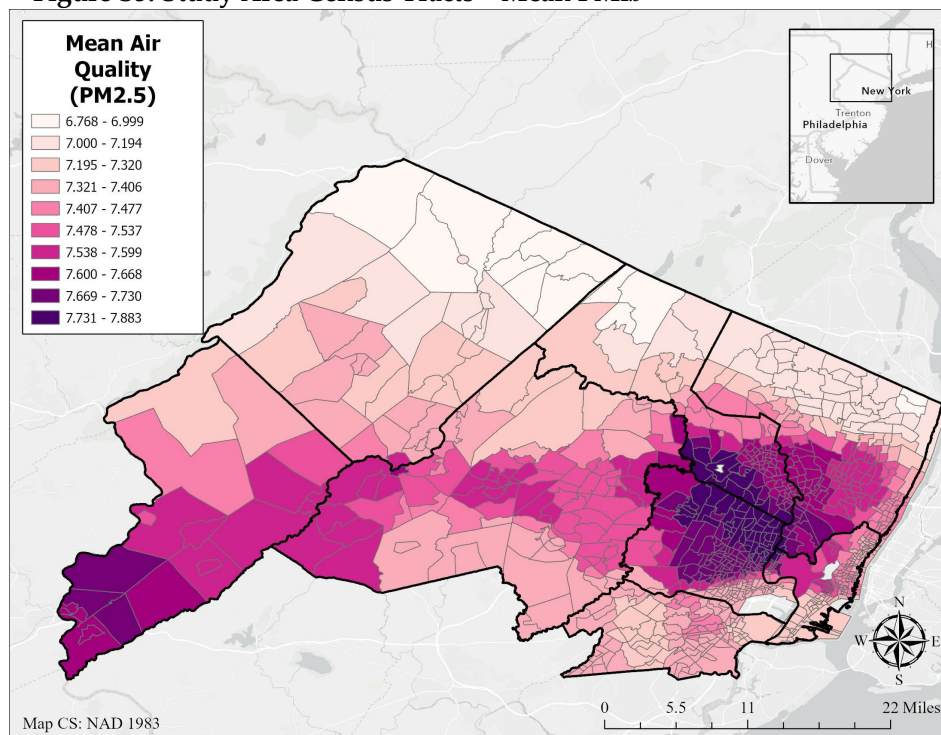

Figure S4. Study Area Census Tracts – Greenery Index (NDMI)

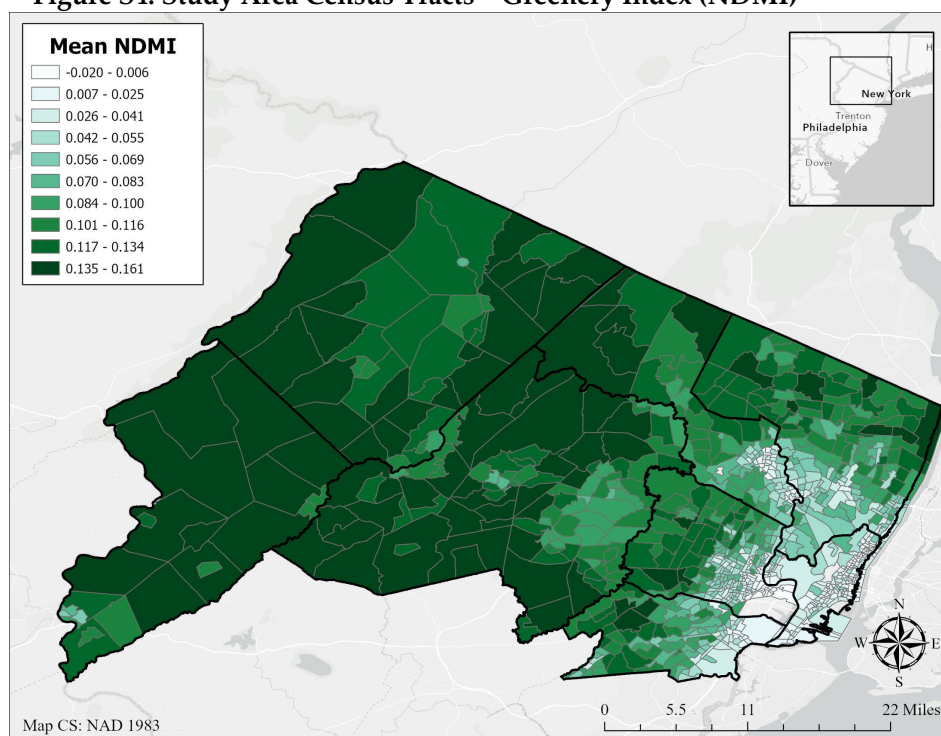

Figure S5. Study Area Census Tracts – Water Index (MNDWI)

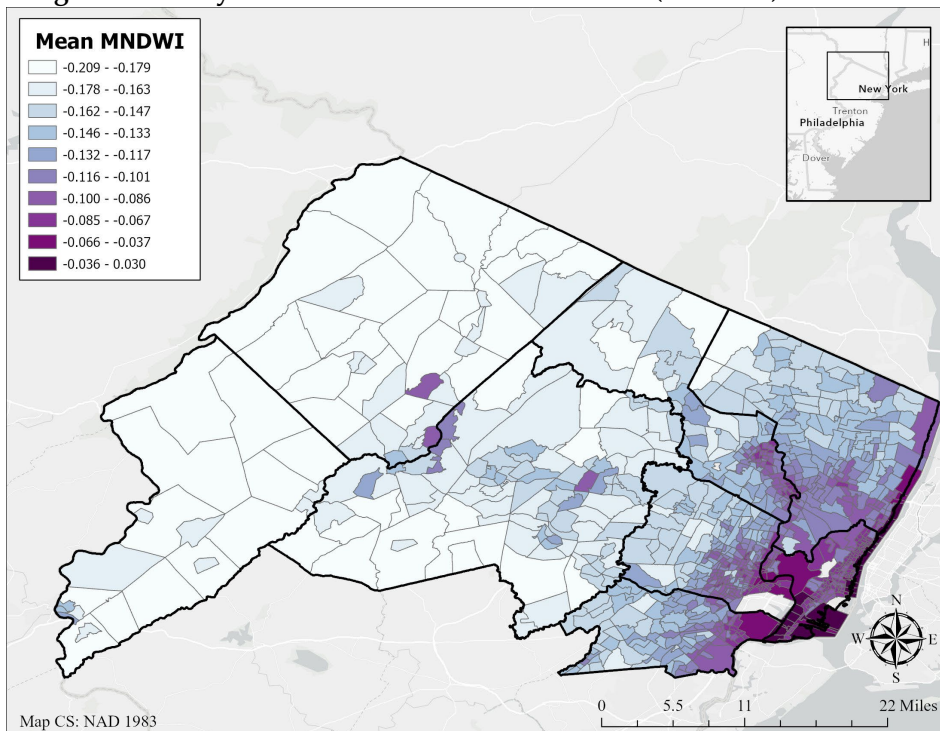

Figure S6. Study Area Census Tracts – Flood Zones

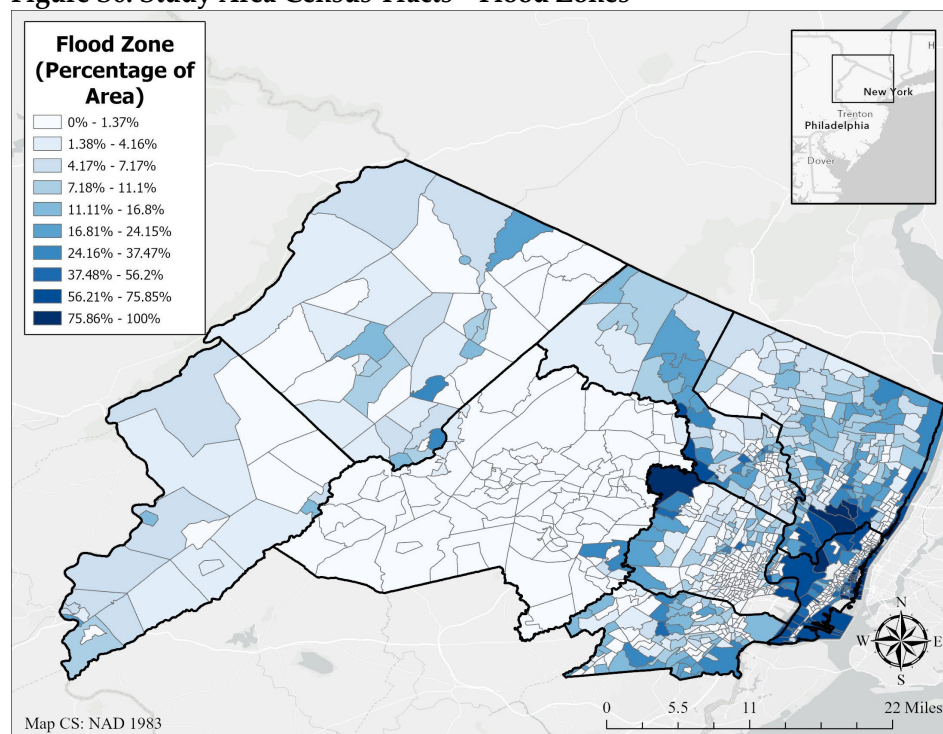

Figure S7. Study Area Census Tracts – Contaminated Sites

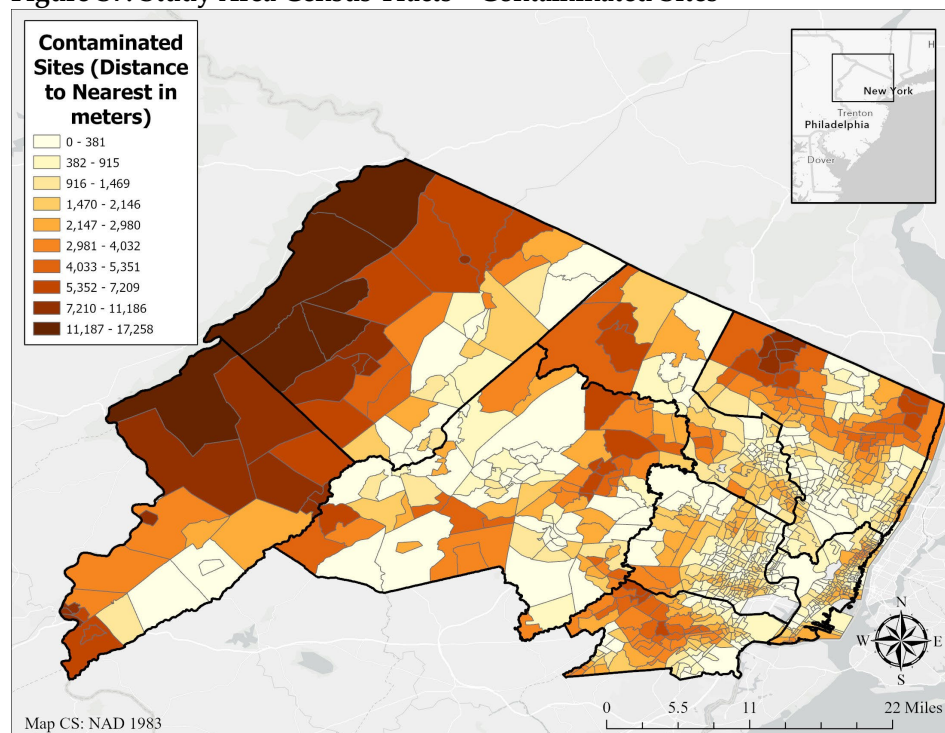

Figure S8. Study Area Census Tracts – AFV Fueling Stations

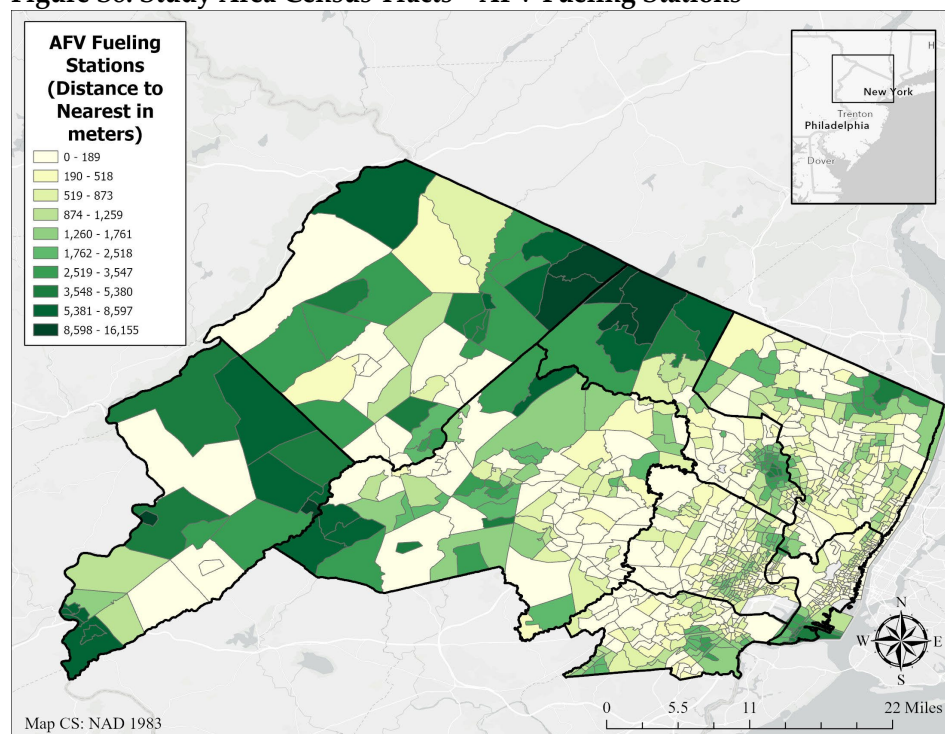

Supplement: s1 [file s1 › remotesensing-2626691-supplementary.pdf]
